# Supplementary material
Source: HighWire-hosted journal article supplement (https://jnnp.bmj.com/content/jnnp-2019-322515)

### Intracerebral Implantation of Human Neural Stem Cells and Motor Recovery after Stroke: Multi-centre Prospective Single-Arm Study (PISCES-2)

Supplementary Data

Supplementary Table 1: Study Schedule

|              | Pre Surgery                         |                                                        |                                     | Post Surgery                        |                                            |         |               |                |                   |                  |                  |
|--------------|-------------------------------------|--------------------------------------------------------|-------------------------------------|-------------------------------------|--------------------------------------------|---------|---------------|----------------|-------------------|------------------|------------------|
|              | Visit 1                             | Visit 2                                                | Visit 3                             | Visit 4                             | Visit 4                                    | Visit 5 | Visit 6       | Visit 7        | Visit 8           | Visit 9          | Visit 10         |
| Visit window | Day 28 -<br>(270 ±7)<br>post stroke | Visit 1 + 28<br>days to day<br>300 (±7) post<br>stroke | Up to 7<br>days prior<br>to surgery | Day 0<br>within<br>3m of<br>visit 2 | Day 0-2<br>(First 48h<br>post<br>injection | Day 2   | Day 7<br>(±2) | Day 28<br>(±4) | Day<br>90<br>(±7) | Day 180<br>(±14) | Day 365<br>(±30) |

Supplementary Table 2: Responses rates subdivided by baseline NIHSS upper limb motor score.

**Supplementary Table 2: Responders to Primary and Secondary Endpoints.**

| Response                        | ARAT subtest 2 (grasp)<br>Primary Outcome |          | ARAT Total Response  |          | Modified Rankin Scale    |           | Barthel Index*        |           | One or More   |              |
|---------------------------------|-------------------------------------------|----------|----------------------|----------|--------------------------|-----------|-----------------------|-----------|---------------|--------------|
|                                 | ≥2 point improvement                      | 4        | ≥6 point improvement | 4        | ≥ 1 category improvement | 4         | ≥ 9 point improvement | 4         | 2 or 3        | 4            |
| <b>NIHSS UL<br/>Motor score</b> | <b>2 or 3</b>                             | <b>4</b> | <b>2 or 3</b>        | <b>4</b> | <b>2 or 3</b>            | <b>4</b>  | <b>2 or 3</b>         | <b>4</b>  | <b>2 or 3</b> | <b>4</b>     |
| <b>3 months</b>                 | 1/14 (7%)                                 | 0/9 (0%) | 3/14 (21%)           | 0/9 (0%) | 6/14 (43%)               | 1/9 (11%) | 3/14 (21%)            | 5/9 (56%) | 8/14 (57%)    | 5/9<br>(55%) |
| <b>6 months</b>                 | 3/13 (23%)                                | 0/9 (0%) | 4/13 (31%)           | 0/9 (0%) | 5/13 (39%)               | 1/9 (11%) | 4/14 (31%)            | 3/9 (33%) | 9/13 (69%)    | 4/9<br>(44%) |
| <b>12 months</b>                | 3/12 (25%)                                | 0/8 (0%) | 5/12 (42%)           | 0/8 (0%) | 6/12 (50%)               | 1/8 (13%) | 3/12 (25%)            | 5/8 (63%) | 9/12 (75%)    | 5/8<br>(62%) |

Supplementary Table 3: Individual patient data for all functional measures.

| Subject No | NIHSS Total | NIHSS Arm Motor | ARAT Item 2 |     |      |      | ARAT Total Score |     |      |      | Barthel Index |     |      |      | Modified Rankin Scale |     |      |      |
|------------|-------------|-----------------|-------------|-----|------|------|------------------|-----|------|------|---------------|-----|------|------|-----------------------|-----|------|------|
|            | Baseline    | Baseline        | Baseline    | d90 | d180 | d365 | baseline         | d90 | d180 | d365 | Baseline      | d90 | d180 | d365 | Baseline              | d90 | d180 | d365 |
| 1          | 6           | 2               | 0           | 1   | 2    | 3    | 0                | 22  | 38   | 54   | 95            | 95  | 100  | 100  | 3                     | 2   | 3    | 2    |
| 2          | 5           | 2               | 0           | 0   | 0    | 0    | 3                | 3   | 3    | 3    | 80            | 75  | 75   | 85   | 3                     | 3   | 3    | 3    |
| 3          | 4           | 2               | 1           | 3   | 3    | 3    | 7                | 43  | 51   | 57   | 95            | 100 | 100  | 100  | 3                     | 2   | 2    | 2    |
| 4          | 3           | 2               | 0           | 0   | 0    | 0    | 7                | 7   | 8    | 7    | 85            | 85  | 90   | 75   | 3                     | 3   | 3    | 3    |
| 5          | 4           | 2               | 0           | 0   | 0    | 0    | 3                | 4   | 6    | 6    | 100           | 100 | 100  | 100  | 2                     | 1   | 1    | 1    |
| 6          | 3           | 2               | 0           | 1   | 1    | 0    | 0                | 9   | 9    | 9    | 90            | 95  | 100  | 85   | 3                     | 2   | 2    | 2    |
| 7          | 8           | 2               | 0           | 0   |      |      | 0                | 0   |      |      | 95            | 90  |      |      | 3                     | 3   |      |      |
| 8          | 6           | 2               | 0           | 0   | 0    | 0    | 0                | 1   | 3    | 3    | 85            | 85  | 95   | 95   | 2                     | 2   | 2    | 2    |
| 9          | 5           | 2               | 0           | 1   | 0    | 2    | 0                | 2   | 3    | 26   | 80            | 90  | 90   | 90   | 2                     | 2   | 3    | 2    |
| 10         | 8           | 3               | 0           | 0   | 0    | 0    | 0                | 0   | 0    | 0    | 30            | 60  | 75   | 70   | 5                     | 4   | 3    | 3    |
| 11         | 6           | 3               | 0           | 0   | 0    | 0    | 0                | 0   | 0    | 0    | 45            | 60  | 40   | 35   | 4                     | 4   | 4    | 4    |
| 12         | 7           | 3               | 0           | 1   | 2    | 0    | 0                | 5   | 18   | 21   | 100           | 100 | 85   | 95   | 3                     | 3   | 4    | 4    |
| 13         | 7           | 4               | 0           | 0   | 0    |      | 0                | 0   | 0    | 0    | 100           | 100 | 100  |      | 3                     | 3   | 3    |      |
| 14         | 7           | 3               | 0           | 0   | 0    |      | 0                | 0   | 0    |      | 45            | 45  | 45   |      | 4                     | 3   | 4    | 6    |
| 15         | 11          | 4               | 0           | 0   | 0    | 0    | 0                | 3   | 3    | 0    | 40            | 75  | 40   | 50   | 4                     | 3   | 3    | 4    |
| 16         | 5           | 4               | 0           | 0   | 0    | 0    | 0                | 0   | 0    | 0    | 65            | 85  | 95   | 95   | 3                     | 3   | 3    | 2    |
| 17         | 8           | 4               | 0           | 0   | 0    | 0    | 0                | 0   | 0    | 0    | 45            | 55  | 45   | 55   | 4                     | 4   | 4    | 4    |
| 18         | 8           | 4               | 0           | 0   | 0    | 0    | 0                | 0   | 0    | 0    | 35            | 35  | 35   | 30   | 4                     | 4   | 4    | 4    |
| 19         | 7           | 3               | 0           | 0   | 0    | 0    | 0                | 0   | 0    | 0    | 70            | 65  | 75   | 65   | 3                     | 3   | 2    | 2    |
| 20         | 16          | 4               | 0           | 0   | 0    | 0    | 0                | 0   | 0    | 0    | 55            | 50  | 50   | 45   | 4                     | 4   | 4    | 4    |
| 21         | 13          | 4               | 0           | 0   | 0    | 0    | 0                | 0   | 0    | 0    | 15            | 40  | 40   | 45   | 4                     | 4   | 4    | 4    |
| 22         | 10          | 4               | 0           | 0   | 0    | 0    | 0                | 0   | 0    | 0    | 15            | 30  | 30   | 30   | 4                     | 4   | 4    | 4    |
| 23         | 7           | 4               | 0           | 0   | 0    | 0    | 0                | 0   | 0    | 0    | 55            | 55  | 55   | 55   | 3                     | 3   | 3    | 4    |

Supplementary Table 4: ARAT responders by cortical involvement or isolated subcortical infarct location.

| Infarct Location  | ARAT item 2 | ARAT item 2 | ARAT item 2 | ARAT total | ARAT total | ARAT total |
|-------------------|-------------|-------------|-------------|------------|------------|------------|
|                   | 3m          | 6m          | 12m         | 3m         | 6m         | 12m        |
| Cortical or mixed | 0/12        | 2/11        | 1/10        | 2/12       | 3/11       | 3/10       |
| Subcortical only  | 1/8         | 1/8         | 2/10        | 1/10       | 1/10       | 2/10       |

*“Cortical” includes 5 with both cortical and subcortical infarct, and 7 isolated cortical infarcts; no infarct was confirmed on imaging in 1 subject and 2 others had no definite location recorded.*

Supplementary Figure 1: Number of subjects exhibiting response on primary and secondary outcome measures at 3, 6 and 12 months divided by baseline NIHSS upper limb motor score (2 or 3 indicates some residual movement, 4 indicates no residual movement). NIHSS signifies National Institutes of Health Stroke Scale.

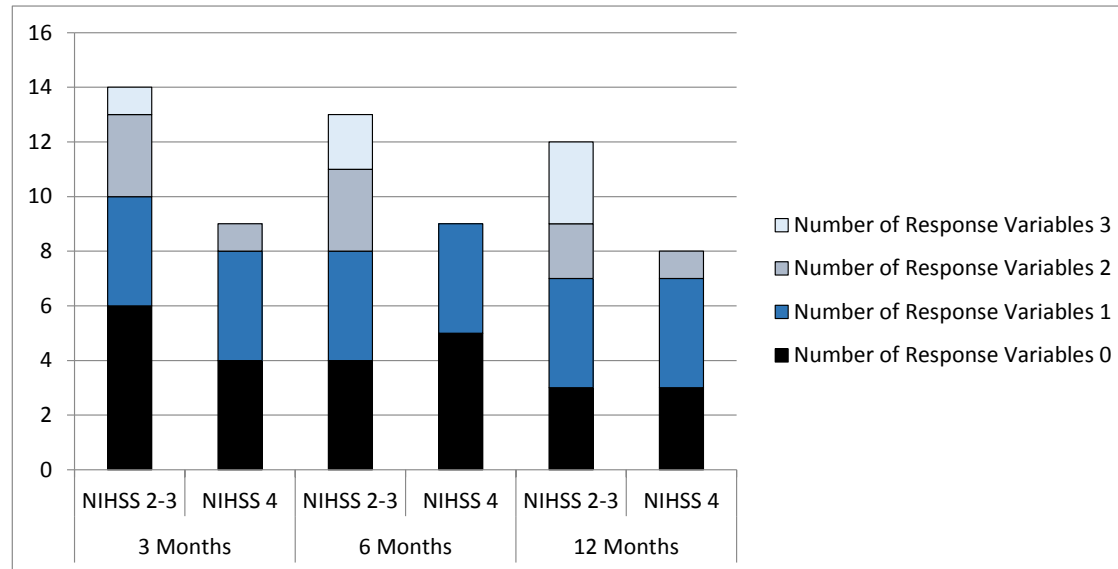

Supplement: inline-supplementary-material-2 [file inline-supplementary-material-2.pdf]
